# Supplementary material for: The Characteristics of Microbiome and Cytokines in Healthy Implants and Peri-Implantitis of the Same Individuals
Source: MDPI journal article supplement (doi:10.3390/jcm11195817), 2022-09-30
Supplement: s1 [file s1]

**Table S3.** Cytokine levels in PICF between healthy implants and peri-implantitis.

| Cytokines    | Concentration [pg/ml, median (Q1, Q3)] |                         | Quantity [pg, median (Q1, Q3)] |                      | <i>p</i> value | <i>q</i> value | log <sub>2</sub> (fc) |
|--------------|----------------------------------------|-------------------------|--------------------------------|----------------------|----------------|----------------|-----------------------|
|              | Healthy                                | Peri-implantitis        | Healthy                        | Peri-implantitis     |                |                |                       |
| Granzyme B   | 171.8 (80.2, 194.9)                    | 200.4 (111.7, 274.7)    | 10.3 (4.8, 11.7)               | 12.0 (6.7, 16.5)     | 0.07           | 0.11           | 0.79                  |
| GRO alpha    | 1450.1 (1106.5, 3209.5)                | 2896.0 (1798.8, 3347.2) | 87.0 (66.4, 192.6)             | 173.8 (107.9, 200.8) | 0.07           | 0.11           | 0.33                  |
| IL-13        | 17.8 (17.4, 19.2)                      | 19.2 (17.7, 20.7)       | 1.1 (1.0, 1.2)                 | 1.2 (1.1, 1.2)       | 0.11           | 0.17           | 0.19                  |
| PDGF-AA      | 27.9 (15.0, 42.3)                      | 38.5 (28.5, 63.0)       | 1.7 (0.9, 2.5)                 | 2.3 (1.7, 3.8)       | 0.15           | 0.22           | 0.71                  |
| MIP-1alpha   | 43.4 (30.5, 52.3)                      | 46.3 (31.9, 68.7)       | 2.6 (1.8, 3.1)                 | 2.8 (1.9, 4.1)       | 0.27           | 0.36           | 0.97                  |
| IFN-gamma    | 9.8 (5.5, 10.5)                        | 6.1 (3.9, 9.9)          | 0.6 (0.3, 0.6)                 | 0.4 (0.2, 0.6)       | 0.27           | 0.36           | -0.17                 |
| MIP-1beta    | 336.4 (118.8, 437.9)                   | 327.5 (239.7, 580.9)    | 20.2 (7.1, 26.3)               | 19.6 (14.4, 34.8)    | 0.29           | 0.37           | 1.14                  |
| IP-10        | 14.1 (6.0, 19.7)                       | 9.7 (2.8, 25.2)         | 0.8 (0.4, 1.2)                 | 0.6 (0.2, 1.5)       | 0.29           | 0.37           | -1.01                 |
| IL-10        | 23.6 (20.5, 29.1)                      | 20.5 (18.4, 31.7)       | 1.4 (1.2, 1.7)                 | 1.2 (1.1, 1.9)       | 0.53           | 0.64           | 0.18                  |
| IL-33        | 10.6 (9.0, 12.2)                       | 12.1 (9.4, 13.7)        | 0.6 (0.5, 0.7)                 | 0.7 (0.6, 0.8)       | 0.54           | 0.64           | 0.17                  |
| IL-4         | 0.2 (0.2, 0.3)                         | 0.3 (0.3, 0.3)          | 0.01 (0.01, 0.02)              | 0.02 (0.01, 0.02)    | 0.56           | 0.64           | 0.12                  |
| MIP-3alpha   | 13.1 (9.5, 18.9)                       | 15.2 (9.5, 18.2)        | 0.8 (0.6, 1.1)                 | 0.9 (0.6, 1.1)       | 0.62           | 0.69           | 0.42                  |
| Flt-3 Ligand | 29.0 (24.4, 43.8)                      | 30.8 (24.2, 44.6)       | 1.7 (1.5, 2.6)                 | 1.8 (1.5, 2.7)       | 0.63           | 0.69           | 0.34                  |
| IFN-alpha    | 2.2 (1.7, 3.0)                         | 1.9 (1.6, 4.0)          | 0.1 (0.1, 0.2)                 | 0.1 (0.1, 0.2)       | 0.68           | 0.72           | 0.61                  |

|             |                       |                       |                   |                   |      |      |      |
|-------------|-----------------------|-----------------------|-------------------|-------------------|------|------|------|
| MIP-3beta   | 2.7 (2.0, 3.6)        | 2.1 (1.8, 3.8)        | 0.2 (0.1, 0.2)    | 0.1 (0.1, 0.2)    | 0.86 | 0.87 | 0.04 |
| CD40 Ligand | 868.7 (497.4, 1146.2) | 689.5 (471.4, 1015.0) | 52.1 (29.8, 68.8) | 41.4 (28.3, 60.9) | 0.86 | 0.87 | 0    |
| EGF         | 47.1 (32.5, 165.1)    | 38.0 (25.5, 100.4)    | 2.8 (2.0, 9.9)    | 2.3 (1.5, 6.0)    | 0.94 | 0.94 | -0.5 |

*Note:* Wilcoxon signed-rank paired test is used for the analysis of levels in PICF between the healthy implants and peri-implantitis.

Abbreviation: PICF, peri-implant crevicular fluid; Q1, quarter; Q3, three quarters.
