# Supplementary material for: The Characteristics of Microbiome and Cytokines in Healthy Implants and Peri-Implantitis of the Same Individuals
Source: MDPI journal article supplement (doi:10.3390/jcm11195817), 2022-09-30
Supplement: s1 [file s1]

**Table S1.** Demographic details and general information of the 14 patients

| Patient | Gender | Age | Number of<br>implants | Number of<br>remaining teeth | Full-mouth<br>mPLI | Full-mouth<br>mGI | Full-mouth<br>mPD | Full-mouth<br>mBOP(%) | Smoker | Periodontitis | Periodontitis<br>stage | Periodontitis<br>grade | Periodontitis<br>Status(controlled) |
|---------|--------|-----|-----------------------|------------------------------|--------------------|-------------------|-------------------|-----------------------|--------|---------------|------------------------|------------------------|-------------------------------------|
| 1       | Male   | 65  | 7                     | 14                           | 2                  | 1                 | 2.90              | 21.00                 | Yes    | Yes           | IV                     | C                      | Yes                                 |
| 2       | Female | 67  | 2                     | 26                           | 1                  | 1                 | 2.63              | 18.00                 | NO     | Yes           | I                      | A                      | Yes                                 |
| 3       | Male   | 62  | 8                     | 18                           | 1                  | 1                 | 2.66              | 25.00                 | Yes    | Yes           | IV                     | C                      | Yes                                 |
| 4       | Male   | 53  | 2                     | 26                           | 1                  | 1                 | 2.77              | 13.10                 | NO     | Yes           | I                      | A                      | Yes                                 |
| 5       | Male   | 66  | 7                     | 20                           | 2                  | 2                 | 2.28              | 25.00                 | NO     | Yes           | I                      | A                      | Yes                                 |
| 6       | Female | 33  | 2                     | 26                           | 2                  | 2                 | 2.96              | 55.95                 | NO     | Yes           | I                      | A                      | No                                  |
| 7       | Male   | 59  | 8                     | 7                            | 1                  | 1                 | 3.5               | 10.00                 | Yes    | Yes           | II                     | A                      | Yes                                 |
| 8       | Male   | 46  | 4                     | 23                           | 1                  | 1                 | 2.49              | 23.72                 | Yes    | NO            |                        |                        | Yes                                 |
| 9       | Male   | 54  | 11                    | 11                           | 1                  | 2                 | 3.23              | 15.08                 | Yes    | Yes           | IV                     | C                      | Yes                                 |
| 10      | Female | 64  | 11                    | 10                           | 2                  | 1                 | 2.91              | 15.56                 | NO     | Yes           | II                     | A                      | Yes                                 |
| 11      | Female | 47  | 8                     | 16                           | 1                  | 1                 | 2.3               | 31.94                 | NO     | NO            |                        |                        | Yes                                 |
| 12      | Male   | 48  | 6                     | 17                           | 2                  | 2                 | 4.07              | 57.97                 | NO     | Yes           | III                    | B                      | No                                  |
| 13      | Female | 57  | 3                     | 24                           | 1                  | 1                 | 2.52              | 1.28                  | NO     | Yes           | I                      | A                      | Yes                                 |
| 14      | Female | 65  | 7                     | 17                           | 1                  | 1                 | 2.5               | 2.27                  | NO     | Yes           | IV                     | B                      | Yes                                 |

Abbreviation: mPLI, mean plaque index; mGI, mean gingival index; mPD, mean pocket depth; mBOP, mean bleeding on probing
