# Supplementary material for: The Characteristics of Microbiome and Cytokines in Healthy Implants and Peri-Implantitis of the Same Individuals
Source: MDPI journal article supplement (doi:10.3390/jcm11195817), 2022-09-30
Supplement: s1 [file s1]

**Table S2.** Demographic details and general information of the 28 implants

| Patient | Implant status   | Implant position | Time in function(months) | mPD (mm) | mBOP(%) | mMBL (mm) | KGW (mm) | Implant brand | Diameter (mm) | Length (mm) | Bone augmentation | Type of restoration |
|---------|------------------|------------------|--------------------------|----------|---------|-----------|----------|---------------|---------------|-------------|-------------------|---------------------|
| 1       | Healthy          | 45               | 41.4                     | 2.16     | 0       | 0         | 1        | Straumann     | 4.1           | 10          | No                | Singles crown       |
| 1       | Peri-implantitis | 21               | 28.6                     | 4.67     | 50      | 2.65      | 6        | straumann     | 3.3           | 14          | No                | Bridge              |
| 2       | Healthy          | 24               | 101.1                    | 3.00     | 0       | 0         | 3        | Straumann     | 3.1           | 10          | No                | Singles crown       |
| 2       | Peri-implantitis | 27               | 98.9                     | 6.00     | 100     | 3.21      | 3        | Straumann     | 4.8           | 10          | Sinus lift        | Singles crown       |
| 3       | Healthy          | 44               | 64.7                     | 2.50     | 0       | 0         | 3        | Straumann     | 4.8           | 10          | No                | Bridge              |
| 3       | Peri-implantitis | 32               | 64.7                     | 4.67     | 100     | 2.58      | 5        | Straumann     | 3.3           | 14          | No                | Bridge              |
| 4       | Healthy          | 26               | 90.2                     | 2.83     | 0       | 0         | 5        | Ankylos       | 4.5           | 11          | No                | Singles crown       |
| 4       | Peri-implantitis | 44               | 73.6                     | 4.33     | 50      | 2.78      | 1        | Straumann     | 4.8           | 8           | No                | Bridge              |
| 5       | Healthy          | 26               | 28.3                     | 2.67     | 0       | 0         | 2        | Straumann     | 4.8           | 10          | Sinus lift        | Bridge              |
| 5       | Peri-implantitis | 36               | 28.3                     | 3.50     | 50      | 1.05      | 3        | Straumann     | 4.1           | 12          | No                | Bridge              |
| 6       | Healthy          | 46               | 60.8                     | 2.00     | 0       | 0         | 2        | Ankylos       | 3.5           | 11          | No                | Singles crown       |
| 6       | Peri-implantitis | 36               | 60.8                     | 5.50     | 100     | 2.32      | 2        | Ankylos       | 3.5           | 11          | No                | Singles crown       |
| 7       | Healthy          | 35               | 97.6                     | 3.00     | 0       | 0         | 0        | Straumann     | 4.1           | 12          | GBR               | Bridge              |
| 7       | Peri-implantitis | 26               | 94.9                     | 6.50     | 100     | 4.75      | 2        | Straumann     | 4.8           | 12          | Sinus lift        | Bridge              |
| 8       | Healthy          | 25               | 49.2                     | 2.67     | 0       | 0         | 5        | Nobel         | 4.3           | 12          | No                | Singles crown       |
| 8       | Peri-implantitis | 16               | 64.7                     | 4.00     | 50      | 5.56      | 4        | Nobel         | 4.3           | 12          | No                | Singles crown       |
| 9       | Healthy          | 24               | 72.5                     | 2.67     | 0       | 0         | 3        | Straumann     | 4.1           | 12          | GBR               | Singles crown       |
| 9       | Peri-implantitis | 13               | 72.5                     | 3.67     | 33.3    | 3.59      | 5        | Straumann     | 4.8           | 12          | No                | Bridge              |
| 10      | Healthy          | 21               | 76.5                     | 2.83     | 0       | 0         | 3        | Straumann     | 3.3           | 14          | GBR               | Bridge              |
| 10      | Peri-implantitis | 25               | 76.5                     | 6.00     | 83.3    | 6.10      | 0        | Straumann     | 4.1           | 12          | Sinus lift        | Bridge              |
| 11      | Healthy          | 37               | 85.8                     | 2.33     | 0       | 0         | 1        | Ankylos       | 4.5           | 11          | No                | Bridge              |
| 11      | Peri-implantitis | 35               | 85.8                     | 3.67     | 83.3    | 2.25      | 0        | Ankylos       | 3.5           | 11          | No                | Bridge              |
| 12      | Healthy          | 44               | 78.9                     | 2.83     | 0       | 0         | 5        | Ankylos       | 3.5           | 11          | No                | Singles crown       |
| 12      | Peri-implantitis | 32               | 78.9                     | 8.33     | 66.7    | 2.71      | 2        | Ankylos       | 3.5           | 11          | No                | Singles crown       |
| 13      | Healthy          | 25               | 81.2                     | 2.17     | 0       | 0         | 2        | Straumann     | 4.1           | 12          | Sinus lift        | Singles crown       |
| 13      | Peri-implantitis | 27               | 81.2                     | 5.33     | 33.3    | 3.73      | 1        | Straumann     | 4.1           | 12          | Sinus lift        | Singles crown       |
| 14      | Healthy          | 26               | 83.8                     | 1.33     | 0       | 0         | 1        | Straumann     | 4.1           | 12          | Sinus lift        | Singles crown       |
| 14      | Peri-implantitis | 17               | 87.7                     | 6.17     | 33.3    | 3.76      | 0        | Straumann     | 4.8           | 10          | Sinus lift        | Bridge              |

Abbreviation: mPD, mean pocket depth; mBOP, mean bleeding on probing; mMBL, mean marginal bone loss; KGW, keratinized gingiva width
